# Supplementary material for: White-Nose Syndrome Fungus: A Generalist Pathogen of Hibernating Bats
Source: PubMed Central journal article supplement (PMC4018256; doi:10.1371/journal.pone.0097224), 2014-05-12
Supplement: pone.0097224.s003.pdf [file pone.0097224.s003.pdf]

**Table S3. Phylogenetic generalized least squares model selection.**

The model predicting *P. destructans* infection based on ecological and behavioural characteristics of bats was selected with the step-down procedure, where the full model is given on the first line and removed variables are listed subsequently.

| <b>Model</b>                                                                                                                                                                                                                                                                    | <b>lnL</b> | <b>AIC</b> | <b>AICc</b> |
|---------------------------------------------------------------------------------------------------------------------------------------------------------------------------------------------------------------------------------------------------------------------------------|------------|------------|-------------|
| Pd ~ CAVE + REGION + CLUSTER + TEMPERATURE + SHELTERhidden + SHELTERexposed + CSIZEsmall + CSIZEmedium + RANGEeverylarge + RANGElarge + RANGEmoderate + FOODcolleoptera + FOODdiptera + FOODgeneralist + FOODlepidoptera + HABITATclosed + HABITATopen + BODYsmall + BODYmedium | -21.1948   | 82.39      | 114.70      |
| ~.-BODYmedium                                                                                                                                                                                                                                                                   | -21.2146   | 80.43      | 108.58      |
| ~.-BODYsmall                                                                                                                                                                                                                                                                    | -21.2856   | 78.57      | 103.00      |
| ~.-FOODlepidoptera                                                                                                                                                                                                                                                              | -21.4081   | 76.82      | 97.92       |
| ~.-FOODgeneralist                                                                                                                                                                                                                                                               | -21.9462   | 75.89      | 94.03       |
| ~.-HABITATopen                                                                                                                                                                                                                                                                  | -22.1580   | 74.32      | 89.80       |
| ~.-FOODdiptera                                                                                                                                                                                                                                                                  | -22.1585   | 72.32      | 85.44       |
| ~.-FOODcolleoptera                                                                                                                                                                                                                                                              | -25.2637   | 76.53      | 87.56       |
| ~.-CLUSTER                                                                                                                                                                                                                                                                      | -25.3162   | 74.63      | 83.81       |
| ~.-REGION                                                                                                                                                                                                                                                                       | -25.5279   | 73.06      | 80.60       |
| ~.-RANGElarge                                                                                                                                                                                                                                                                   | -25.6031   | 71.21      | 77.32       |
| ~.-CAVE                                                                                                                                                                                                                                                                         | -26.0697   | 70.14      | 75.00       |
| ~.-RANGEeverylarge                                                                                                                                                                                                                                                              | -26.5378   | 69.08      | 72.87       |
| ~.-TEMPERATURE                                                                                                                                                                                                                                                                  | -29.8421   | 73.68      | 76.56       |
| ~.-RANGEmoderate                                                                                                                                                                                                                                                                | -31.1150   | 74.23      | 76.33       |
