# Supplementary material for: White-Nose Syndrome Fungus: A Generalist Pathogen of Hibernating Bats
Source: PLoS One. 2014 May 12;9(5):e97224. doi: 10.1371/journal.pone.0097224 (PMC4018256; doi:10.1371/journal.pone.0097224)
Supplement: Table S2 — Accession numbers for phylogeny reconstruction. A total of 13 available mitochondrial and nuclear genes were used for phylogeny reconstruction of bat species from Europe and North America. (XLSX) [file pone.0097224.s002.xlsx]

## Sheet: Accession numbers
Species	12S	Coi	Cyb	Nd1	Nd2	Apob	Dmp1	Prkc1	Rag2	Stat5A exon	Stat5A intron	Thy exon	Thy intron
Barbastella barbastellus	AF326089	JF442794		DQ915031		GU328124	GU328213	GU328288	GU328049				GU328431
Corynorhinus townsendii	AF263238	GU723176				GU328131	AY141891	GU328294	AY141029		GU328369		GU328437
Eptesicus fuscus	AF326092	JF498650	AF376835	AY033968		GU328136	GU328223	GU328298	GU328058		GU328373		GU328441
Eptesicus nilssonii		JF442808	AF376836	AB079822					DQ120811
Eptesicus serotinus	HM561626	JF442822	EU751000	DQ915024		HM561596	HM561696	HM568389	HM561651	HM568355		HM593075
Miniopterus schreibersii	GU328042	JF442828	EF530345	DQ915086	AY169460	GU328153	GU328235	GU328310	GU328070		GU328384		GU328454
Myotis austroriparius	AY495493	GU723112	AM261885						AM265642
Myotis bechsteinii		JF442864	AF376843	AY033978					AM265643
Myotis brandtii		JF442928	AM261886	AY699869					AM265647
Myotis californicus	AY495495	GU723121	AM261887		AY504564	GU328161	GU328243	GU328319	GU328078		GU328392		GU328462
Myotis capaccinii	AY495494		AF376845	DQ915052		GU328162	GU328244	GU328320	GU328079		GU328393		GU328463
Myotis ciliolabrum	AY495497	JF498687	AM261890			GU328163	GU328245	GU328321	GU328080		GU328394		GU328464
Myotis dasycneme		JF442936	AF376846						AM265652
Myotis daubentonii	AY495498	JF442974	AB106590	AY699872					FN641679
Myotis emarginatus		JF442977	AF376849	DQ915045					AM265656
Myotis evotis		GU723126	AJ841949						AM265657
Myotis grisescens		GU723217							AM265664
Myotis leibii		GU723221	AM262331						AM265671
Myotis lucifugus		GU723130	AF376854	AY033967	AY504565				AM265683
Myotis myotis	AF326098		GU817384			GU328170	GU328252	GU328328	GU328087		GU328401		GU328471
Myotis mystacinus		JF443004							AM265680
Myotis nattereri		JF443018	AB106606	AB106584					DQ120814
Myotis occultus			AF294500
Myotis oxygnathus			AF376841	DQ915053					AM265645
Myotis septentrionalis	AY495507	JF498703				GU328173	GU328255	GU328331	GU328090		GU328404		GU328474
Myotis sodalis		GU723231	AM262337						AM265692
Myotis thysanodes	AF326100	GU723125	AF376869			GU328174	GU328256	GU328332	GU328091		GU328405		GU328475
Myotis velifer	AY495509	GU723140	EU680299			GU328175	AY141895	GU328333	AY141033		GU328406		GU328476
Myotis volans	AY495510	GU723242	AF376872			GU328176	GU328258	GU328334	GU328092		GU328407		GU328477
Myotis yumanensis	AY495512	GU723138	AF376875			GU328178	GU328260	GU328336	GU328094		GU328409		GU328479
Parastrellus hesperus	AY495522	GU723251				GU328187	GU328265		GU328099		GU328413		GU328483
Perimyotis subflavus	AY495523	JF498718	AJ504449			HM561607	GU328269	GU328345	GU328103		GU328416		GU328487
Pipistrellus kuhlii		JF443063	HQ687497	DQ914991					DQ120829
Pipistrellus pipistrelllus	HM561630		AJ504443	DQ914975			HM561707	HM568401	HM561662	HM568361	HM568361	HM593087
Plecotus auritus	AF326106	JF443098	EF570882	AY699874		GU328188	GU328266	GU328342	GU328100		GU328414		GU328484
Plecotus austriacus	AF326107			AF516270		GU328189	GU328267	GU328343	GU328101		GU328415		GU328485
Rhinolophus euryale		JX008090	EU360625
Rhinolophus ferrumequinum	JN392460	JF443129	AB085721	DQ888656	GU296892			FJ171146	JQ327808
Rhinolophus hipposideros		JF443132	EU360632	DQ888658				FJ171137					FJ171204
Vespertilio murinus	AY395866	JF443149	AB287359	AB287348		HM561620	HM561720	HM568415	HM561676			HM593101
